1           **Synthesis and characterization of poly(propylene imine) dendrimers, as nanocarriers of**

2                           **Benznidazole: an in vitro controlled release assay**

3                           **Jenny Ordoñez-Benavides<sup>1,2\*</sup> and Henry Andrade-Caicedo<sup>3</sup>**

4  
5   <sup>1</sup> Grupo de Investigación en Dinámica Cardiovascular, Centro de Bioingeniería, Escuela Ciencias de  
6   la Salud, Universidad Pontificia Bolivariana, Medellín, Antioquía, Colombia. <sup>2</sup>Facultad de Ciencias  
7   Exactas y Aplicadas, Instituto Tecnológico Metropolitano ITM, Medellín, Antioquía, Colombia.

8   <sup>3</sup> Grupo de Investigaciones en Bioingeniería y Microelectrónica, Centro de Bioingeniería, Escuela de  
9   Ingenierías, Universidad Pontificia Bolivariana, Medellín, Antioquía, Colombia

10   \* Corresponding author

11   [jenny.ordonez@upb.edu.co](mailto:jenny.ordonez@upb.edu.co)

12  
13   These authors contributed equally to this work.

14  
15   **Abstract**

16   Background: American trypanosomiasis, or Chagas disease, is the result of an infection caused by  
17   the *Trypanosoma cruzi* parasite. The disease is endemic in Latin America, where the main clinical  
18   manifestation and cause of death of Chagas patients is cardiomyopathy. The current approved  
19   treatment for this disease is based on the use of the nitroheterocyclic compound, Benznidazole. The  
20   drug is administered in high doses and for prolonged periods, which causes serious adverse effects,  
21   eventually leading to treatment discontinuation. In addition, it has only shown efficacy in the acute  
22   phase of the disease. Benznidazole has low solubility, low permeability, low bioavailability and high  
23   toxicity in the body. These physicochemical characteristics can be improved by using dendritic  
24   structures that serve as nanocarriers.

26 Methods: In this research, poly(propylene imine) PPI dendrimers in generations 4.0 G and 5.0 G  
27 were synthesized and characterized. We performed the synthesis by divergent approach. We  
28 encapsulated Benznidazole using the equilibrium dialysis method, and we evaluated the loading  
29 efficiency and the concentration of the released drug by high-performance liquid chromatography  
30 (HPLC).

31

32 Results: Preliminary results showed a drug loading efficiency on the dendrimer of 78% and an  
33 entrapment percentage of 99.6%. The release kinetics showed a controlled and sustained release  
34 over time compared to dendrimer-free Benznidazole.

35

36 Conclusions: The PPI 5.0 G - Benznidazole dendrimer system could be considered as an alternative  
37 to be evaluated in vitro and in vivo, as an alternative to conventional treatment of Chagas disease.  
38 The next stage of the experimental work consists of standardizing an infection model of H9C2  
39 cardiomyocytes with Colombian strains of *Trypanosoma cruzi*, in order to evaluate the effect of the  
40 encapsulated drug on nanocarriers.

41

42 **Keywords: Poly(propylene imine); Nanocarrier; Benznidazole; Chagas disease; Synthesis;**  
43 **Characterization; *Trypanosoma cruzi*; Loading efficiency; Drug encapsulation**

44

45

46 **Introduction**

47 Chagas disease is a serious and important public health problem in Latin America, both in terms of  
48 health, socioeconomic impact and geographical distribution (1)(2). It is estimated that eight million  
49 people are infected worldwide, mainly in Latin America, where the disease is endemic in 21  
50 countries (3)(4). Each year, 41,200 new cases of infected persons are reported, approximately

51 12,000 deaths per year due to cardiac complications, and 586 000 young adults of productive age  
52 are disabled. Currently, millions of chronically infected people are at risk of developing  
53 cardiovascular and/or digestive pathologies, making Chagas disease one of the main causes of  
54 morbidity and premature death due to cardiac complications in Latin America (5)(6). In addition,  
55 migratory phenomena have caused the expansion of the disease to non-endemic countries such as  
56 the United States, Canada and several European countries, Japan and Australia (5). The therapy  
57 currently available for chagasic patients at any stage is limited to the use of the FDA-approved orally  
58 administered nitroheterocyclic drug Benznidazole (BZN). The drug has been shown effective in the  
59 acute phase of the disease, where the parasitological cure is 80%. However, in the indeterminate  
60 and chronic phases, only about 5 to 10% parasitological cure has been demonstrated (2).

61

62 Benznidazole is hydrophobic in nature, therefore, it has low permeability, low solubility, low  
63 bioavailability and high toxicity in the body and can be rapidly metabolized by the liver, leaving very  
64 little active ingredient in the specifically injured tissue. The Biopharmaceutical Classification System  
65 has assigned a class IV categorization, which is due to the low solubility of the drug in water and its  
66 low permeability (7). These properties lead to the drug impacting uninjured tissues causing side  
67 effects, making the treatment ineffective and unsafe (8). Regarding the therapeutic management of  
68 chronic Chagas cardiomyopathy (CCC), in addition to antiparasitic treatment, it has been managed  
69 according to the conventional institutionalized treatment for similar cardiomyopathies caused by  
70 other etiologies (9). The antiparasitic treatment could be improved if some of the physicochemical  
71 properties of the trypanocidal drug, such as solubility, bioavailability and bioaccumulation, are  
72 modified and/or improved. Currently, several researches have been developed to improve drug  
73 solubility. These investigations are aimed at using techniques such as solid dispersion (10,11),  
74 nanosuspension methods (12)(13), particle size reduction (14)(15), cryogenic methods (16), micellar

75 solubilization techniques (17)(16), processes with supercritical fluids (18), and the use of dendrimers  
76 (19) (20). Among these methods, the use of dendrimers has gained much attention due to the  
77 structure, surface functional groups and presence of electrostatic and covalent bonds between the  
78 drug and the dendrimer (20). The dendrimer-drug complex improves bioavailability, release time  
79 and drug delivery in the injured tissue (21). Dendrimers are spherical, monodisperse nanostructures  
80 with a symmetrical structure, having a central core surrounded by branches composed of repeating  
81 monomeric units and terminal functional groups. These structural characteristics allow drugs to be  
82 encapsulated in the core or conjugated to the functional groups (22). Dendrimers offer the  
83 advantage of encapsulating the drug, and additionally, they allow the conjugation of molecular  
84 targets and biocompatible coating molecules in their terminal functional groups, forming polymeric  
85 nanoplateforms, making therapy increasingly effective and selective (23).

86  
87 Regarding the use of dendrimers in parasitic treatment, few results have been published. Giarolla  
88 et al., demonstrated the possibility of using dendrimers as drug transporters. They constructed  
89 dendrimers from myoinositol, D-mannose and malic acid. The dendrimer was used to encapsulate  
90 hydroxymethylnitrofurazone as a bioactive agent. Fernandez et al., evaluated the use of a first-  
91 generation dendrimer as a candidate for delivery of the anti-*T. cruzi* compound, (2'-(benzo [1,2- c]  
92 1,2,5-oxadiazole-5(6)-yl (N-1-oxide) methylidene]-1-methoxy me- thane hydrazide), finding that  
93 dendrimers could be suitable for transporting antichagasic drugs. The research of Garolla and  
94 Fernández is reported in the work of Juárez-Chavéz et al. (24).

95  
96 Among the dendrimers that can be used for drug release are poly(propylene imine) (PPI)  
97 dendrimers. PPI dendrimers are synthesized by divergent approach, by double Michael addition  
98 reaction of acrylonitrile to ethylenediamine nuclei, followed by a reduction of CN groups to primary  
99 amino groups by catalyst-assisted hydrogenation (25).

100

101 In this research work, we synthesized PPI dendrimers in generations 4.0 G and 5.0 G by divergent  
102 approach, using ethylenediamine as core and acrylonitrile as branches. The synthesized dendrimers  
103 were characterized both physicochemical and morphologically by infrared spectroscopy (FTIR),  
104 proton nuclear magnetic resonance (HMNR), transmission electron microscopy (TEM) and  
105 nanoparticle tracking analysis (NTA). We used the synthesized dendrimers to encapsulate BNZ.  
106 Finally, we evaluated the drug loading into the dendrimer and the release kinetics of the  
107 encapsulated drug in vitro by HPLC. The concentrations were determined from the calibration curve  
108 of the pure drug.

109

## 110 **2. Materials and methods**

111

### 112 **2.1 Materials**

113 Benznidazole, (N-benzyl-2-nitro-1-imidazolacetamide) was donated by the American  
114 Trypanosomiasis Laboratory of the Institute of Biomedical Research of the National Autonomous  
115 University of Mexico (UNAM). Ethylenediamine (C<sub>2</sub>H<sub>8</sub>N<sub>2</sub>, 99% purity from PANREAC), acrylonitrile  
116 (C<sub>3</sub>H<sub>3</sub>N, 99% purity from Sigma – Aldrich), gaseous hydrogen (H<sub>2</sub> UAP grade 5 from CRYOGAS), Raney  
117 Níquel (Merck), methanol (CH<sub>3</sub>OH 99% purity from Sigma – Aldrich), phosphate-buffered saline  
118 solution PBS 0,01M, pH 7,4 (SIGMA, USA), cellulose membrane 12-14 kDa (spectral/by molecular  
119 porous membrane tubing, USA), acetonitrile HPLC grade (Merk). The chemical reagents used in the  
120 synthesis were analytical grade and HPLC grade.

121

122

123

## 124 **2.2 HPLC analytical method for Benznidazole quantification**

125 We quantified BZN according to the method reported by Da Silva RM (26) with some modifications.  
126 We used the HPLC (SHIMADZU LC-2010), available at the biology laboratory of Universidad Pontificia  
127 Bolivariana and an LC 18 column, 250\*4.6 mm, 5  $\mu$ m, with an operating temperature of 25°C. The  
128 mobile phase consisted of a mixture of acetonitrile HPLC grade and ultrapure water (5:95), which  
129 was pumped with an isocratic flow rate of 0.7 ml/min. BZN was detected by monitoring the  
130 absorbance of the eluent column at 324 nm in an Ultraviolet-Visible detector. The concentrations  
131 of the analyte were determined from a calibration curve of the pure analyte.

132

## 133 **2.3 Synthesis and characterization of poly (propylene imine) dendrimers (PPI).**

134 We synthesized PPI dendrimers in generations 4.0 G and 5.0 G by double Michael addition reaction  
135 of acrylonitrile to ethylenediamine cores, followed by heterogeneous hydrogenation catalyzed by  
136 Raney-Nickel according to the method reported by De Brabander et al (27) and Jain K et al (28).  
137 Briefly, 2.7 ml of ethylenediamine were mixed with 12 ml of acrylonitrile and 26 ml of deionized  
138 water. An exothermic reaction occurs, which indicates that double Michael addition reaction has  
139 started. The system was placed at 80°C for one hour using a temperature-controlled heating plate.  
140 Under these conditions, the double Michael addition reaction is allowed to complete. Excess  
141 acrylonitrile was removed as azeotropic water by rotoevaporation at 40°C and 16 mbar for 15  
142 minutes. The final Michael reaction product corresponds to the intermediate generation dendrimer  
143 EDA-dendri (CN)<sub>4</sub> 0.5 G. The product obtained was dissolved in methanol, placed in the catalytic  
144 hydrogenation vessel and completed by volume with 2.5 g of Raney-Nickel as catalyst, and deionized  
145 water. The final volume of the reaction vessel was 70 ml. The catalytic hydrogenation reaction was  
146 carried out at 24 bar pressure, 70°C, 200 rpm and a constant flow of gaseous hydrogen for 1 hour.  
147 Excess water was removed by rotoevaporation at 80°C and 16 mbar for 15 minutes. This product

148 corresponds to the dendrimer of PPI 1.0 G. The whole synthesis process was repeated until  
149 dendrimers in higher generations were obtained 4.0 G and 5.0 G. For the synthesis of higher  
150 generations, the amount of acrylonitrile was increased. The generational growth process of the PPI  
151 dendrimers is depicted in Fig 1.

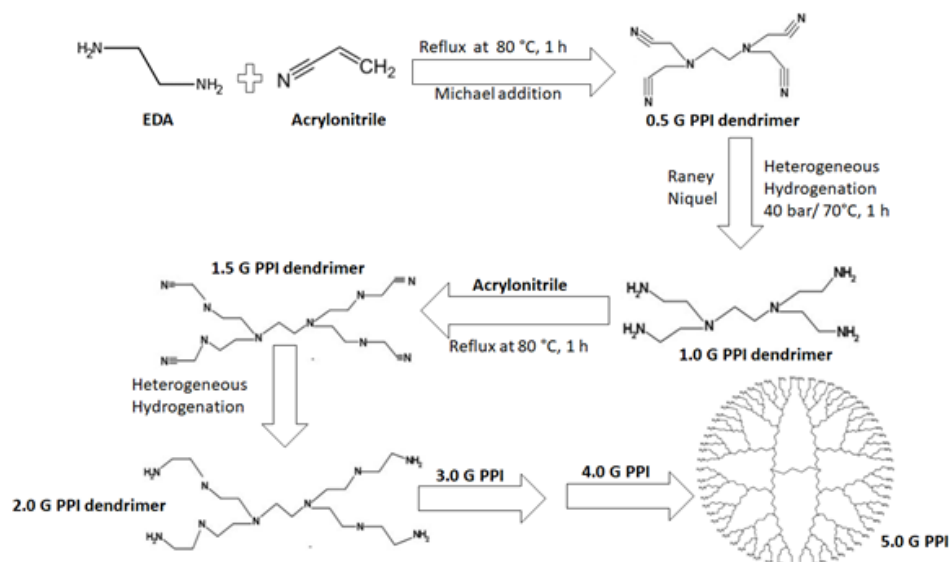

152  
153

154 Fig 1. Generational growth process of poly(propylene imine) PPI dendrimers.

155

## 156 2.4 Physicochemical and morphological characterization of PPI dendrimers

157

158 We determined the topography of the dendrimers using the transmission electron microscopy  
159 (TEM), FEI Tecnai G2 F20, including a sample preparation system. Samples were stained with uranyl  
160 acetate as a contrast medium. We performed chemical characterization using Fourier Transform  
161 Infrared Spectroscopy (FTIR) and proton nuclear magnetic resonance ( $^1\text{H}$ NMR). A Thermo Scientific  
162 Nicolet iS50 infrared spectrometer, Massachusetts, USA, was used. The samples were placed  
163 directly in sample holders of the equipment. The FTIR spectra were recorded at room temperature,  
164 in a working range of  $4000 - 400 \text{ cm}^{-1}$  with a resolution of  $4 \text{ cm}^{-1}$ . The  $^1\text{H}$ NMR technique was  
165 performed to confirm the synthesis of PPI dendrimers. The samples were analyzed in a Bruker

166 AMX400 spectrometer, Texas, USA. We dissolved the samples in deuterated chloroform and  
167 analyzed them at 300 MHz. The size of the nanoparticles and the concentration of nanoparticles per  
168 milliliter of the PPI dendrimers were determined using the Nanoparticle Tracking Analysis (NTA)  
169 technique. To perform the analyses, the samples were dispersed in deionized water at a ratio of 1:5.  
170 Additionally, we characterized the drug encapsulated in the PPI dendrimer by FTIR and TEM of under  
171 the same conditions as mentioned above.

172

### 173 **2.5 Benznidazole encapsulation in PPI dendrimers**

174 We encapsulated Benznidazole in PPI 5.0 G dendrimer using the equilibrium dialysis method. We  
175 weighed and dissolved 50 mg of the dendrimer in 50 ml of ultrapure water. The solution was placed  
176 under constant stirring at 200 rpm and 37°C using a CORNING PC-420D magnetic stirring and heating  
177 plate. 39 mg of the pure drug was added to the dendrimer dissolved in water. The dendrimer  
178 solution with drug was left in constant stirring at 37°C for 72 hours. Finally, it was dialyzed using a  
179 standard MWCO cellulose membrane between 12-14 kDa and 29 mm in diameter. The solution was  
180 placed in the dialysis bed and immersed in 250 ml ultrapure water. The dialysis process was carried  
181 out for 60 minutes at 170 rpm and 37°C. At the end of the dialysis time, the membrane was removed  
182 and the product, corresponding to the drug encapsulated in the dendrimer, was collected. We  
183 determined the encapsulation efficiency of the trypanocidal drug by indirect method, calculating  
184 the amount of non-encapsulated drug, for which an aliquot of 1 ml of dialysis water was taken,  
185 filtered through a 0.45 µm membrane, placed in the vial and analyzed by HPLC. Finally, we calculated  
186 indirectly the loading efficiency and the percentage of encapsulated drug, using the following  
187 mathematical relationships:

188

$$189 \text{ Drug loading efficiency (\%)} = LE = \left( \frac{M_1 - M_2}{D} \right) * 100\%$$
$$190 \text{ Percentage of encapsulated drug (\%)} = PME = \left( \frac{M_1 - M_2}{M_1} \right) * 100\%$$



191

192

## 193 **2.6 Benznidazole release from PPI 5.0 G dendrimers in vitro**

194 We determined the drug release kinetics in intestinal simulation fluids. For this purpose, we used a  
195 0.01 M Phosphate-Buffered Saline (PBS) solution adjusted to pH 7.4, suitable for cell culture. In vitro  
196 release was performed using the equilibrium dialysis technique. We took 5 ml of the encapsulated  
197 drug solution from the dendrimer and placed on cellulose membrane (12-14 kDa). The cellulose  
198 membrane was sealed at both ends and immersed in 25 ml of release medium. The system was  
199 stirred at 400 rpm and 37°C for 240 hours. We withdraw 1 ml of sample and replace it with 1 ml of  
200 fresh medium at known time intervals. We filtered the removed aliquot on 0.45 µm pore membrane  
201 and analyzed by HPLC. Finally, we calculated the concentration of the drug released from the  
202 standardized calibration curve for the pure drug. For comparison purposes, we performed in vitro  
203 release of the pure drug. For this purpose, 20 mg of BZN were weighed, placed on the dialysis  
204 membrane, and dialyzed in PBS, according to the method described above. We performed the  
205 release of pure BZN during 48 hours.

206

## 207 **3. Results and Discussion**

208

### 209 **3.1 Synthesis and characterization of PPI dendrimers in 4.0 and 5.0 G generation**

210 Synthesis of PPI-type dendrimers was achieved by double Michael addition reaction followed by  
211 catalytic hydrogenation. Ethylenediamine was used as the core of the dendrimer and the  
212 acrylonitrile molecule contributed the branches to the dendrimer growth. PPI dendrimers grow  
213 radially and in generations, starting at the 1.0 G generation and reaching up to the 5.0 G generation.  
214 During synthesis, intermediate generations are formed first, which have -CN groups in their  
215 structure; these groups are transformed into primary amines - NH<sub>2</sub> by heterogeneous

216 hydrogenation catalyzed by Raney Niquel (29). During the synthesis, a color variation from pale  
217 yellow, in the 1.0 G generation, to yellowish brown, in the 5.0 G generation, was evidenced. The  
218 synthesized dendrimers presented viscous consistency, similar to bee honey, except for the  
219 intermediate generation 0.5 G, which appeared itself as a white solid mass. The physicochemical  
220 and morphological characterization performed by FTIR evidenced the presence of 4.0 G and 5.0 G  
221 generation dendrimers. Fig 2 shows the FTIR diffractogram of the PPI 5.0 G dendrimer. In the  
222 infrared analysis, a rocking vibration characteristic of the CH<sub>2</sub> bonds was observed at 796 cm<sup>-1</sup>; at  
223 1063 cm<sup>-1</sup>, the bending vibrations of the N-H bonds of the tertiary amines are observed; at 2936 cm<sup>-1</sup>,  
224 the asymmetric tension vibrations of the C-H bonds are present; at 1670 cm<sup>-1</sup>, a narrow band  
225 corresponding to the vibrations of the N-H groups is observed; a band of lower intensity was  
226 observed at 1414 cm<sup>-1</sup>, which corresponds to the scissoring vibrations of the CH<sub>2</sub> groups. A narrow  
227 band at 2550 cm<sup>-1</sup>, indicates the self-tension of the nitrile C≡N groups and finally around 3436 cm<sup>-1</sup>  
228 a broad and pronounced band corresponding to the characteristic tension vibration of the NH<sub>2</sub>  
229 bonds of the terminal amino groups is observed. The peaks obtained confirmed that the nitrile  
230 groups were reduced to amino terminal groups. Additionally, the FTIR results were confirmed by  
231 <sup>1</sup>HNMR, as shown in Figure 2-b. Between 0.9 and 1.3 ppm, the methyl group (CH<sub>3</sub>) peaks coming  
232 from the dendrimer core were obtained and the alkyl groups -CH<sub>2</sub>-CH<sub>2</sub>- were obtained between 1.2  
233 and 1.65 ppm, between 2.548 ppm and 2.693 ppm, the peak of the tertiary amine protons [-N(CH<sub>2</sub>)<sub>3</sub>]  
234 is found; between 2.712 and 2.994, the primary amine groups (CH<sub>2</sub>NH<sub>2</sub>) are found and finally a  
235 pronounced peak is observed at 7.307, which corresponds to the primary amine proton, thus  
236 confirming the synthesis of PPI dendrimer at generation 5.0 G. It is noteworthy that the peak at  
237 7.307 ppm in the PPI 5.0 G dendrimers is more pronounced than in the PPI 4.0 G dendrimers, (data  
238 not shown in the paper) due to the higher number of hydrogens in the dendrimer structure. While  
239 the dendrimer in generation 4.0 G has 32 amino terminal groups, the dendrimer in generation 5.0

240 G has 64 amino terminal groups. Similar bands in both FTIR and <sup>1</sup>HNMR were present in the PPI 4.0  
241 G dendrimer. The results found are similar to those reported by Patel et al. (30) and by Birdhariya  
242 et al. (31). Fig 3 shows the morphology of the dendrimers in 4.0 G and 5.0 G generation. The  
243 dendrimers are of radial growth, the morphology is spherical in the higher generations, and  
244 therefore, in generation 4.0 G a spherical morphology can be appreciated, with some irregularities  
245 and trying to form agglomerates. As the number of terminal amino groups increases, the shape is  
246 completely spherical and with no tendency to agglomerate, as can be seen in the micrograph of the  
247 dendrimer in 5.0 G generation. According to the literature, one of the special properties of  
248 dendrimers is their spherical shape and nanometer size, these morphological properties make them  
249 excellent candidates for hydrophobic drug nanocarriers. According to Sonam Choudhary et al.  
250 (2017), the dendrimers present compact and globular structure with spherical shape and regular  
251 architecture (21), a description that agrees with the results obtained in the synthesis of PPI  
252 dendrimers in higher generations by divergent approach. Table 1 shows the particle size  
253 corresponding to PPI 4.0 G and 5.0 G dendrimers. According to the results obtained for the size of  
254 the dendrimers by NTA, it is evident that as the dendrimer grows in generation, its size increases.  
255 The obtained size growth results agree with the dendrimer size comparison study performed by  
256 Prashant Kesharwani et al. In this study, they compared by TEM and DLS analysis the size of PPI  
257 dendrimers in 3.0 G, 4.0 G and 5.0 G generation (32).  
258

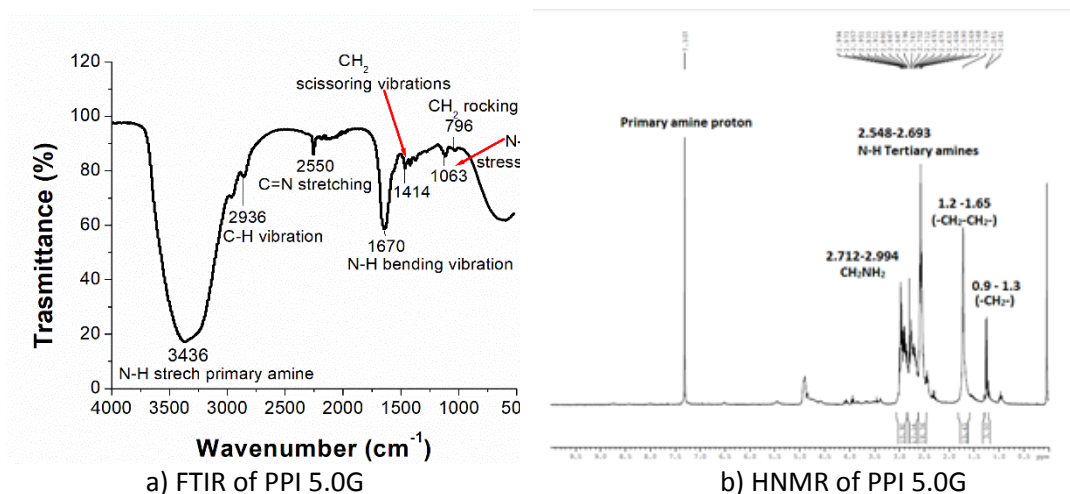

259 Fig 2. Chemical characterization of PPI dendrimers in 5.0 G generation  
260

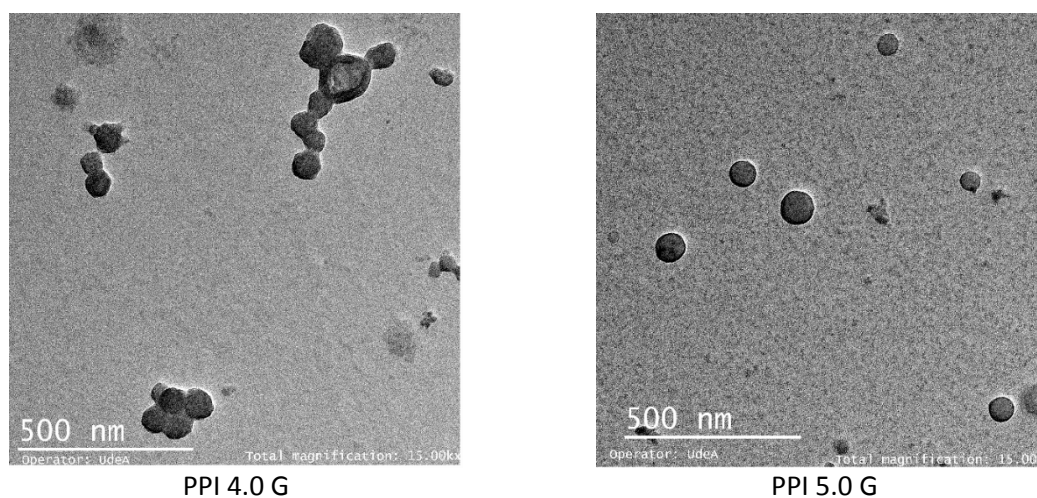

261 Fig 3. Morphology of PPI dendrimers in 4.0 G and 5.0 G generation synthesized by divergent  
262 approach.

263

264 Table 1. Size and concentration of PPI dendrimers in 4.0 G and 5.0 G generation

265

| PPI dendrimer generation | Size (nm) |    | Dendrimer concentration/ml              |
|--------------------------|-----------|----|-----------------------------------------|
|                          | Average   | SD |                                         |
| PPI 4.0 G                | 146       | 63 | $5.40 \times 10^8 \pm 7.79 \times 10^7$ |
| PPI 5.0 G                | 157       | 66 | $1.02 \times 10^9 \pm 2.78 \times 10^7$ |

266

### 267 3.2 Determination of encapsulation efficiency and entrapment efficiency of BZN in PPI 5.0 G

268 dendrimers

269 The entrapment efficiency and encapsulation efficiency of BZN was performed indirectly. Two drug  
270 concentrations, 10  $\mu$ M and 30  $\mu$ M, were evaluated. The concentrations were determined from the  
271 standardized calibration curve for the pure analyte. The results obtained are shown in Table 2.

272

273

274

275

276 Table 2. Loading and entrapment efficiency of Benznidazole in PPI 5.0 G dendrimers

| <b>Encapsulated drug</b> | <b>BZN mass (mg)</b> | <b>Loading efficiency (%)</b> | <b>Entrapment efficiency (%)</b> |
|--------------------------|----------------------|-------------------------------|----------------------------------|
| BZN/PPI 5.0G 30 $\mu$ M  | 39                   | 78                            | 99,61                            |
| BZN/PPI 5.0G 10 $\mu$ M  | 13                   | 17,6                          | 67,69                            |

277

278 As shown in Table 2, increasing the amount of BZN to be encapsulated increases the encapsulation  
279 efficiency and the drug entrapment efficiency at this loading percentage, which is close to 100% of  
280 drug molecules. This indicates that the hydrophobic BZN molecules adhere to the dendrimer cores  
281 via hydrophobic and hydrogen bonding interactions. The dendrimer cores are formed of tertiary  
282 amines; therefore, they tend to retain the BZN particles, through hydrogen bridge type interactions.  
283 In addition, the cavities of the PPI dendrimer are highly hydrophobic, which increases the possibility  
284 of interaction with hydrophobic drugs such as BZN (33). According to the literature, the amount of  
285 host molecules entrapped in the dendrimer is proportional to the shape and size of the molecule to  
286 be encapsulated, as well as to the shape and size of the available internal cavities of the dendritic  
287 structure (34). In addition, higher generations of dendrimers have greater capacity and in turn more  
288 space to encapsulate hydrophobic fractions (22), allowing for improved solubility properties of  
289 drugs such as BZN, which has low solubility and low permeability (35). Considering the above, the  
290 synthesized PPI 5.0 G dendrimers are suitable structures for encapsulating BZN. These structures  
291 presented adequate internal cavities to house the drug molecules, evidenced by the entrapment

292 percentage of 99.61% and the loading efficiency of 78%. Entrapment efficiency is an important  
293 parameter in determining the drug release characteristics from the dendrimer (36). The drug was  
294 physically entrapped within the dendritic structure due to the presence of spherical cavities. These  
295 cavities are hydrophobic and exhibit affinity for drugs with similar solubility characteristics, such as  
296 BZN. Likewise, the drug can form hydrogen bridges with the nitrogen atoms present in the PPI  
297 cavities (37). Therefore, the interactions of PPI towards BZN are non-covalent, hydrophobic and Van  
298 der Waals type interactions, mainly hydrogen bonds. Non-covalent type interactions are used to  
299 improve the solubility of insoluble drugs (38).  
300 In addition, drug encapsulation was confirmed by FTIR and NTA techniques. Figure 4 shows the FT-  
301 IR spectrum of the drug encapsulated in the PPI 5.0 G dendrimer.

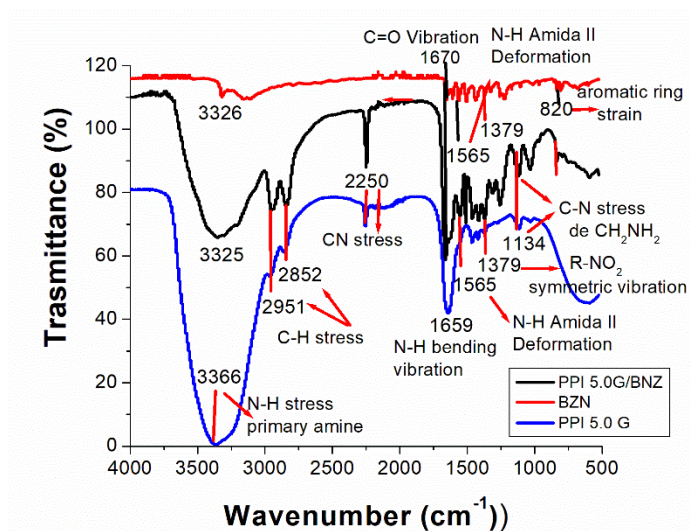

302  
303 Fig 4. Comparison of the FT-IR spectra of PPI 5.0 G (black line), BZN without PPI (red line), and BZN  
304 encapsulated in PPI 5.0 G (blue line) The FT-IR spectrum of the encapsulated drug shows the  
305 characteristic bands of BZN and PPI 5.0 G. This demonstrates that the drug was successfully  
306 encapsulated in the dendrimer. The IR spectrum of the drug can be divided into three fragments:  
307 imidazole group, benzyl group, and the acetamide fragment. It shows an intense band close to  
308 3281cm<sup>-1</sup> characteristic of the absorption of the secondary amines present in the acetamide

309 fragment (39). This band overlaps with the characteristic bands of the primary amines of the PPI  
310 dendrimer, which occur in the region of  $3550\text{ cm}^{-1}$  and  $3320\text{ cm}^{-1}$ . The amide I band was observed  
311 at  $1565\text{ cm}^{-1}$ , while the amide II bands showed N-H bending strains at  $1565\text{ cm}^{-1}$ . The vibration at  
312  $1670\text{ cm}^{-1}$  is characteristic for the bond of the carbonyl group C=O of the drug. The tension bands in  
313 the aromatic ring appear at  $820\text{ cm}^{-1}$ . The intensity of the band in the tension of the C-N bond  
314 present in the imidazole group was observed at  $1157\text{ cm}^{-1}$ . The R-NO<sub>2</sub> functional group showed  
315 characteristic symmetric vibration at  $1379\text{ cm}^{-1}$ . The values found in the characteristic bands are in  
316 agreement with those reported in the literature (39). The NTA assay confirmed an increase in the  
317 size of the dendrimer with the encapsulated drug. The free dendrimer had a size of  $(157 \pm 66)\text{ nm}$ ,  
318 while the dendrimer containing the encapsulated drug had a size of  $(194 \pm 47)\text{ nm}$ .

319

### 320 **3.3 In vitro release kinetics of encapsulated Benznidazole in PPI 5.0 G dendrimers**

321 The estimation of the release profile was performed in vitro, by the equilibrium dialysis technique,  
322 using 0.01M PBS and pH 7.4 as the release medium. Fig 5 and fig 6 show the release behavior of BZN  
323 over time. Fig 5 indicates the release profile in mg/ml concentration and Fig 6 shows the release  
324 percentage. From the figures, it can be inferred that there was a controlled and sustained release  
325 over time. The maximum amount of drug released was at 230 hours. It is important to note that  
326 there were no abrupt releases of the drug; on the contrary, the behavior of the curve was of slow  
327 growth over time.

328

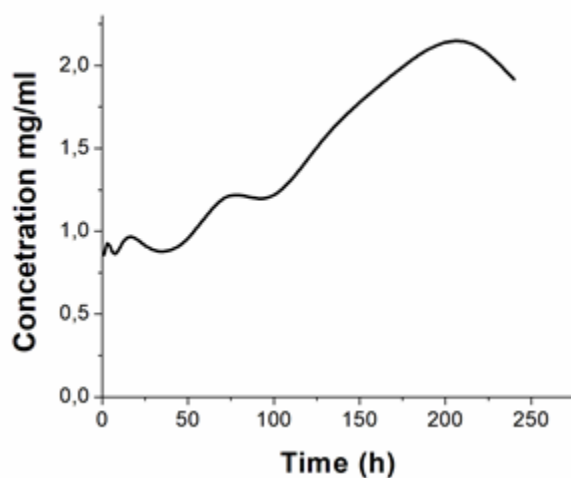

**Fig 5. BZN release from PPI 5.0G dendrimer at concentration.**

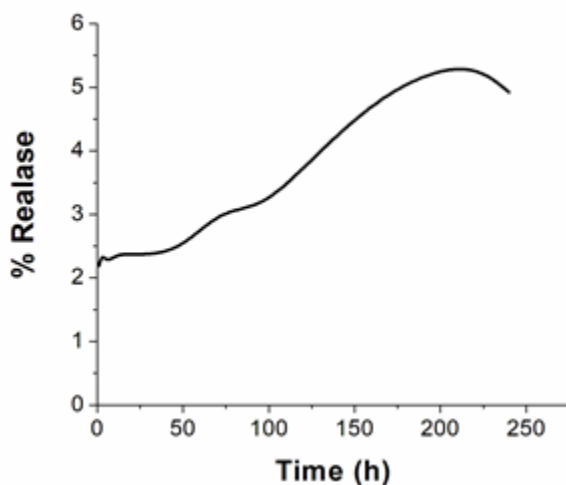

**Fig 6. BZN release curve of PPI 5.0 G dendrimer.**

329

330

Fig 6 shows the release of dendrimer-free BZN in 0.01M PBS and pH 7.4. The release was carried out

331

for 48 hours. From the figure, we can see that release is fast. In the first 24 hours, about 40% of the

332

drug was released. Compared to fig 5, it was observed that the entrapped drug in the dendrimer

333

does not allow the BZN molecules to be easily released. This release behavior is related to the

334

entrapment efficiency of the nanostructure towards the drug, which was 99.61%. Fig 6 shows that

335

2.5% of the drug was released in the first 48 hours, compared to Fig 7, which shows that 40% of the

336

drug was released in the same hours. Evidencing that dendrimers as drug transporters improve the



337 pharmacokinetic properties of drugs, improve their solubility in aqueous media, remain longer in  
338 the blood circulation, improve transit through biological barriers and delay drug degradation (24).  
339

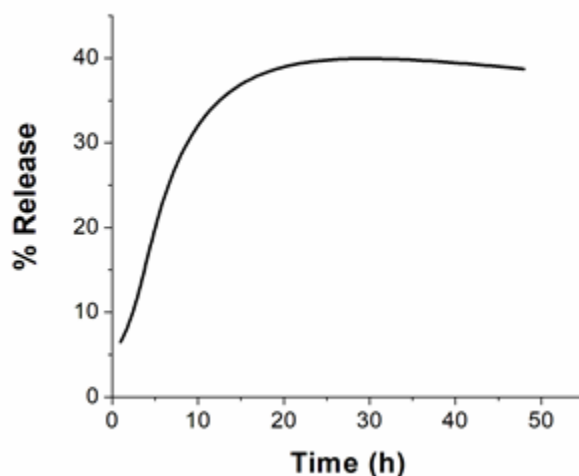

Fig 7. Release curve of BZN in PBS, pH 7.4

340  
341  
342  
343

### Conclusion

344 In the present research, it was possible to synthesize PPI dendrimers in 4.0 G and 5.0 G generation.  
345 The physicochemical and morphological characterization confirmed the synthesis of these  
346 nanostructures. The synthesized dendrimers presented spherical shape and nanometric size,  
347 favorable characteristics to encapsulate hydrophobic drugs. The synthesized PPI dendrimers were  
348 used to encapsulate BZN. The drug was encapsulated with a loading efficiency of 78% and an  
349 entrapment efficiency of 99.6%. The release kinetics of the PPI 5.0 G - BZN system showed a  
350 prolonged and sustained release profile over time. Using PPI 5.0 G dendrimers to encapsulate drugs  
351 such as BZN could be an alternative for the treatment of Chagas disease since it would improve the  
352 physicochemical properties of the drug.

353

354 **Acknowledgements**

355 The authors thank Dr. Isabel Cristina Ortiz Trujillo, from the Biología de Sistemas group at UPB, for  
356 allowing us to use the laboratories and facilities to perform the experiments. Also, to Dr. Luis Alberto  
357 Ríos from the Industrial Chemical Process Group of the Universidad de Antioquia, where the  
358 materials used in this work were synthesized.

359

## 360 **Funding**

361 The author Jenny Ordoñez-Benavides was supported by Ministerio de Ciencia Tecnología e  
362 Innovación – Minciencias (call 647), Ph.D. studies. This work was supported by the UPB-Innova  
363 Program at Universidad Ponticia Bolivariana. The publication fees were financed by the Centro de  
364 Investigaciones para el Desarrollo Integral - CIDI of the Universidad Ponticia Bolivariana UPB, and  
365 the Research Operations Department of the Instituto Tecnológico Metropolitano de Medellín ITM.

366

## 367 **References**

- 368 1. Benziger CP, do Carmo GAL, Ribeiro ALP. Chagas Cardiomyopathy. *Cardiol Clin*.  
369 2017;35(1):31–47.
- 370 2. Bermudez J, Davies C, Simonazzi A, Pablo Real J, Palma S. Current drug therapy and  
371 pharmaceutical challenges for Chagas disease. *Acta Trop* [Internet]. 2016;156:1–16.  
372 Available from: <http://dx.doi.org/10.1016/j.actatropica.2015.12.017>
- 373 3. Carneiro CM, Sánchez-Montalvá A, de Oliveira RC, Sales Junior PA, Fonseca Murta SM,  
374 Salvador F, et al. Experimental and Clinical Treatment of Chagas Disease: A Review. *Am J*  
375 *Trop Med Hyg* [Internet]. 2017;97(5):1–33. Available from:  
376 <http://www.ncbi.nlm.nih.gov/pubmed/29016289>
- 377 4. WHO WHO. Sustaining the drive to overcome the global impact of neglected tropical  
378 diseases [Internet]. Vol. 3.9, WHO Library Cataloguing-in-Publication Data. Switzerland;  
379 2013. Available from: [www.who.int](http://www.who.int)
- 380 5. World Health Organization. Research priorities for Chagas disease, human African  
381 trypanosomiasis and leishmaniasis. [Internet]. World Health Organization technical report  
382 series. 2012. p. v–xii, 1–100. Available from:  
383 <http://www.ncbi.nlm.nih.gov/pubmed/23484340>
- 384 6. Miranda-Schaeubinger M, Chakravarti I, Freitas Lidani KC, Omidian Z, Gilman RH.  
385 Systematic Review of the Epidemiology of Chagas Disease in the Americas: a Call for  
386 Standardized Reporting of Chagas Disease Prevalence. *Curr Trop Med Reports*. 2019;
- 387 7. Benet LZ, Broccatelli F, Oprea TI. BDDCS applied to over 900 drugs. *AAPS J*. 2011;13(4):519–  
388 47.
- 389 8. Morilla MJ, Romero EL. Nanomedicines against Chagas disease: an update on therapeutics,  
390 prophylaxis and diagnosis. *Nanomedicine (Lond)* [Internet]. 2015;10(3):465–81. Available  
391 from: <http://www.ncbi.nlm.nih.gov/pubmed/25707979>

- 392 9. Cruz JS, Machado FS, Ropert C, Roman-Campos D. Molecular mechanisms of cardiac  
393 electromechanical remodeling during Chagas disease: Role of TNF and TGF- $\beta$ . Trends  
394 Cardiovasc Med [Internet]. 2016;1–11. Available from:  
395 <http://linkinghub.elsevier.com/retrieve/pii/S1050173816301116>
- 396 10. Gupta P, Kakumanu VK, Bansal AK. Stability and solubility of celecoxib-PVP amorphous  
397 dispersions: A molecular perspective. Pharm Res. 2004;21(10):1762–9.
- 398 11. Sinha S, Ali M, Baboota S, Ahuja A, Kumar A, Ali J. Solid dispersion as an approach for  
399 bioavailability enhancement of poorly water-soluble drug ritonavir. AAPS PharmSciTech.  
400 2010;11(2):518–27.
- 401 12. Agrawal Y, Patel V. Nanosuspension: An approach to enhance solubility of drugs. J Adv  
402 Pharm Technol Res. 2011;2(2):81.
- 403 13. Tessarolo LD, De Menezes RRPPB, Mello CP, Lima DB, Magalhães EP, Bezerra EM, et al.  
404 Nanoencapsulation of benzimidazole in calcium carbonate increases its selectivity to  
405 *Trypanosoma cruzi*. Parasitology. 2018;145(9):1191–8.
- 406 14. Blagden N, de Matas M, Gavan PT, York P. Crystal engineering of active pharmaceutical  
407 ingredients to improve solubility and dissolution rates. Adv Drug Deliv Rev. 2007;59(7):617–  
408 30.
- 409 15. Scalise ML, Arra EC, Rial MS, Esteva MI, Salomon CJ, Fichera LE. Promising efficacy of  
410 benzimidazole nanoparticles in acute trypanosoma cruzi murine model: In-vitro and in-vivo  
411 studies. Am J Trop Med Hyg. 2016;95(2):388–93.
- 412 16. Chaudhary A, Nagaich U, Gulati N, Sharma V, Khosa R, Partapur M. Enhancement of  
413 solubilization and bioavailability of poorly soluble drugs by physical and chemical  
414 modifications: A recent review. J Adv Pharm Educ Res. 2012;2(1):32–67.
- 415 17. Seedher N, Kanojia M. Micellar solubilization of some poorly soluble antidiabetic drugs: A  
416 technical note. AAPS PharmSciTech. 2008;9(2):431–6.
- 417 18. Girotra P, Singh SK, Nagpal K. Supercritical fluid technology: A promising approach in  
418 pharmaceutical research. Pharm Dev Technol. 2013;18(1):22–38.
- 419 19. Sherje AP, Jadhav M, Dravyakar BR, Kadam D. Dendrimers: A versatile nanocarrier for drug  
420 delivery and targeting. Int J Pharm [Internet]. 2018;548(1):707–20. Available from:  
421 <https://doi.org/10.1016/j.ijpharm.2018.07.030>
- 422 20. Huang D, Wu D. Biodegradable dendrimers for drug delivery. Mater Sci Eng C [Internet].  
423 2018;90(October 2017):713–27. Available from:  
424 <https://doi.org/10.1016/j.msec.2018.03.002>
- 425 21. Choudhary S, Gupta L, Rani S, Dave K, Gupta U. Impact of dendrimers on solubility of  
426 hydrophobic drug molecules. Front Pharmacol. 2017;8(MAY):1–23.
- 427 22. Gorzkiewicz M, Klajnert-Maculewicz B. Dendrimers as nanocarriers for nucleoside  
428 analogues. Eur J Pharm Biopharm [Internet]. 2017;114(January):43–56. Available from:  
429 <http://linkinghub.elsevier.com/retrieve/pii/S0939641116303915>
- 430 23. Thakur S, Kesharwani P, Tekade RK, Jain NK. Impact of pegylation on biopharmaceutical  
431 properties of dendrimers. Polym (United Kingdom) [Internet]. 2015;59:67–92. Available  
432 from: <http://dx.doi.org/10.1016/j.polymer.2014.12.051>
- 433 24. Juárez-Chávez L, Pina-Canseco S, Soto-Castro D, Santillan R, Magaña-Vergara NE, Salazar-  
434 Schettino PM, et al. In vitro activity of steroidal dendrimers on *Trypanosoma cruzi*  
435 epimastigote form with PAMAM dendrons modified by “click” chemistry. Bioorg Chem  
436 [Internet]. 2019;86(January):452–8. Available from:  
437 <https://doi.org/10.1016/j.bioorg.2019.01.056>
- 438 25. Kesharwani P, Mishra V, Jain NK. Generation dependent hemolytic profile of folate  
439 engineered poly(propyleneimine) dendrimer. J Drug Deliv Sci Technol [Internet].

- 440 2015;28:1–6. Available from: <http://dx.doi.org/10.1016/j.jddst.2015.04.006>
- 441 26. Da Silva RM, Oliveira LT, Barcellos NMS, De Souza J, De Lana M. Preclinical monitoring of  
442 drug association in experimental chemotherapy of Chagas' disease by a new HPLC-UV  
443 method. *Antimicrob Agents Chemother*. 2012;56(6):3344–8.
- 444 27. de Brabander -van den Berg, and Meijer EW. Poly(propylene imine) Dendrimers: Large -  
445 Scale Synthesis by Heterogeneously Catalyzed Hydrogenations. *Angew Chemie Int Ed*  
446 *English*. 1993;32(9):1308–11.
- 447 28. Jain K, Verma AK, Mishra PR, Jain NK. Characterization and evaluation of amphotericin B  
448 loaded MDP conjugated poly(propylene imine) dendrimers. *Nanomedicine*  
449 *Nanotechnology, Biol Med [Internet]*. 2015;11(3):705–13. Available from:  
450 <http://dx.doi.org/10.1016/j.nano.2014.11.008>
- 451 29. Kesharwani P, Tekade RK, Jain NK. Formulation development and in vitro-in vivo  
452 assessment of the fourth-generation PPI dendrimer as a cancer-targeting vector.  
453 *Nanomedicine (Lond) [Internet]*. 2014;(April 2015). Available from:  
454 <http://www.ncbi.nlm.nih.gov/pubmed/24593000>
- 455 30. Patel HK, Gajbhiye V, Kesharwani P, Jain NK. Ligand anchored poly(propyleneimine)  
456 dendrimers for brain targeting: Comparative in vitro and in vivo assessment. *J Colloid*  
457 *Interface Sci [Internet]*. 2016;482:142–50. Available from:  
458 <http://dx.doi.org/10.1016/j.jcis.2016.07.047>
- 459 31. Birdhariya B, Kesharwani P, Jain NK. Effect of surface capping on targeting potential of  
460 folate decorated poly (propylene imine) dendrimers. *Drug Dev Ind Pharm [Internet]*.  
461 2014;00(00):1–7. Available from: <http://www.ncbi.nlm.nih.gov/pubmed/25163759>
- 462 32. Kesharwani P, Tekade RK, Jain NK. Generation dependent cancer targeting potential of  
463 poly(propyleneimine) dendrimer. *Biomaterials [Internet]*. 2014;35(21):5539–48. Available  
464 from: <http://dx.doi.org/10.1016/j.biomaterials.2014.03.064>
- 465 33. Najafi F, Salami-Kalajahi M, Roghani-Mamaqani H, Kahaie-Khosrowshahi A. A comparative  
466 study on solubility improvement of tetracycline and dexamethasone by poly(propylene  
467 imine) and polyamidoamine dendrimers: An insight into cytotoxicity and cell proliferation. *J*  
468 *Biomed Mater Res - Part A*. 2020;108(3):485–95.
- 469 34. Pedziwiatr-Werbicka E, Milowska K, Dzitruk V, Ionov M, Shcharbin D, Bryszewska M.  
470 Dendrimers and hyperbranched structures for biomedical applications. *Eur Polym J*  
471 *[Internet]*. 2019;119(July):61–73. Available from:  
472 <https://doi.org/10.1016/j.eurpolymj.2019.07.013>
- 473 35. Mazzeti AL, Oliveira LT, Gonçalves KR, Schaun GC, Mosqueira VCF, Bahia MT. Benznidazole  
474 self-emulsifying delivery system: A novel alternative dosage form for Chagas disease  
475 treatment. *Eur J Pharm Sci [Internet]*. 2020;145(July 2019):105234. Available from:  
476 <https://doi.org/10.1016/j.ejps.2020.105234>
- 477 36. Rahman HS, Rasedee A, How CW, Abdul AB, Zeenathul NA, Othman HH, et al. Zerumbone-  
478 loaded nanostructured lipid carriers: Preparation, characterization, and antileukemic effect.  
479 *Int J Nanomedicine*. 2013;8:2769–81.
- 480 37. Ortega MÁ, Merino AG, Fraile-Martínez O, Recio-Ruiz J, Pekarek L, Guijarro LG, et al.  
481 Dendrimers and dendritic materials: From laboratory to medical practice in infectious  
482 diseases. *Pharmaceutics*. 2020;12(9):1–27.
- 483 38. Gupta U, Perumal O. Dendrimers and Its Biomedical Applications. In: *Natural and Synthetic*  
484 *Biomedical Polymers [Internet]*. 1st ed. South Dakota, USA: Elsevier Inc.; 2014. p. 243–57.  
485 Available from: <http://dx.doi.org/10.1016/B978-0-12-396983-5.00016-8>
- 486 39. Espinosa YR, Galvis-ovallos F, Roza AM. Purification of the antichagasic benznidazole from  
487 the commercial preparation Rochegan : characterization of inclusion complexes with  $\beta$  -

488 cyclodextrin. J Cienc e Ing [Internet]. 2018;10(1):32–8. Available from:  
489 <https://www.researchgate.net/publication/323342988%0APurification>  
490
